# Supplementary material for: Blood Immunophenotypes of Idiopathic Pulmonary Fibrosis: Relationship with Disease Severity and Progression
Source: MDPI journal article supplement (doi:10.3390/ijms241813832), 2023-09-07
Supplement: s1 [file s1]

# Blood Immunophenotypes of Idiopathic Pulmonary Fibrosis: Relationship with Disease Severity and Progression

Nuria Mendoza <sup>1,2,3</sup>, Sandra Casas-Recasens <sup>1,2</sup>, Núria Olvera <sup>1,2,4</sup>, Fernanda Hernandez-Gonzalez <sup>1,3,5</sup>, Tamara Cruz <sup>1,2</sup>, Núria Albacar <sup>1,2,5</sup>, Xavier Alsina-Restoy <sup>5</sup>, Alejandro Frino-Garcia <sup>5</sup>, Gemma López-Saiz <sup>5</sup>, Lucas Robres <sup>2</sup>, Mauricio Rojas <sup>6</sup>, Alvar Agustí <sup>1,2,3,5</sup>, Jacobo Sellarés <sup>1,2,5,†</sup> and Rosa Faner <sup>1,2,3,\*,†</sup>

<sup>1</sup> Institut d'Investigacions Biomediques August Pi i Sunyer (IDIBAPS), 08036 Barcelona, Spain; nmendoza@recerca.clinic.cat (N.M.); sacasas@recerca.clinic.cat (S.C.-R.); olvera@recerca.clinic.cat (N.O.); fherandez@clinic.cat (F.H.-G.); cruz@recerca.clinic.cat (T.C.); albacar@clinic.cat (N.A.); aagusti@clinic.cat (A.A.), sellares@clinic.cat (J.S.)  
<sup>2</sup> Centro de Investigación Biomédica en Red de Enfermedades Respiratorias (CIBERES), 28029, Madrid, Spain; lrobres@recerca.clinic.cat  
<sup>3</sup> Biomedicine Department, Universitat de Barcelona, 08036 Barcelona, Spain  
<sup>4</sup> Barcelona Supercomputing Center (BSC), 08034 Barcelona, Spain  
<sup>5</sup> Respiratory Institute, Clinic Barcelona, 08036 Barcelona, Spain; xalsina@clinic.cat (X.A.-R.); adfrino@clinic.cat (A.F.-G.); gsaiz@recerca.clinic.cat (G.L.-S.)  
<sup>6</sup> Department of Internal Medicine, The Ohio State University Wexner Medical Center, Columbus, OH 43210, USA; mauricio.rojas@osumc.edu  
\* Correspondence: rfaner@recerca.clinic.cat; Tel.: +34-93-227-1715; Fax: +34-93-227-1716  
† These authors contributed equally to this work.

Online supplement: 314 words; 5 Tables; 3 Figures.

## Supplementary tables

**Table S1.** Gating immunophenotypes explored in the flow cytometry analysis.

| Immune populations                                | Gating Phenotype (after CD45 <sup>+</sup> cells/Single/Live)                              | % Reference population                     |
|---------------------------------------------------|-------------------------------------------------------------------------------------------|--------------------------------------------|
| <b>Lymphocyte panel</b>                           |                                                                                           |                                            |
| Lymphocytes CD3 <sup>+</sup>                      | CD45 <sup>+</sup> CD3 <sup>+</sup>                                                        | CD45 <sup>+</sup> alive                    |
| CD8 <sup>+</sup> T cells                          | CD45 <sup>+</sup> CD3 <sup>+</sup> CD8 <sup>+</sup>                                       | CD45 <sup>+</sup> CD3 <sup>+</sup>         |
| CD4 <sup>+</sup> T cells                          | CD45 <sup>+</sup> CD3 <sup>+</sup> CD4 <sup>+</sup>                                       | CD45 <sup>+</sup> CD3 <sup>+</sup>         |
| Effector T cells                                  | CD45 <sup>+</sup> CD3 <sup>+</sup> CD45RA <sup>+</sup> CD19 <sup>-</sup>                  | CD4 <sup>+</sup> /CD8 <sup>+</sup> T cells |
| Effector memory T cells                           | CD45 <sup>+</sup> CD3 <sup>+</sup> CD45RA <sup>-</sup> CD19 <sup>-</sup>                  | CD4 <sup>+</sup> /CD8 <sup>+</sup> T cells |
| Central memory T cells                            | CD45 <sup>+</sup> CD3 <sup>+</sup> CD45RA <sup>-</sup> CD19 <sup>+</sup>                  | CD4 <sup>+</sup> /CD8 <sup>+</sup> T cells |
| Naive T cells                                     | CD45 <sup>+</sup> CD3 <sup>+</sup> CD45RA <sup>+</sup> CD19 <sup>+</sup>                  | CD4 <sup>+</sup> /CD8 <sup>+</sup> T cells |
| Th1 cells                                         | CD45 <sup>+</sup> CD3 <sup>+</sup> CD4 <sup>+</sup> CD183 <sup>+</sup> CD196 <sup>-</sup> | CD4 <sup>+</sup> T cells                   |
| Th17 cells                                        | CD45 <sup>+</sup> CD3 <sup>+</sup> CD4 <sup>+</sup> CD183 <sup>-</sup> CD196 <sup>+</sup> | CD4 <sup>+</sup> T cells                   |
| Regulatory T cells (Tregs)                        | CD45 <sup>+</sup> CD3 <sup>+</sup> CD4 <sup>+</sup> CD25 <sup>+</sup> CD127 <sup>-</sup>  | CD4 <sup>+</sup> T cells                   |
| HLA-DR <sup>+</sup> T cells                       | CD45 <sup>+</sup> CD3 <sup>+</sup> HLA-DR <sup>+</sup>                                    | CD4 <sup>+</sup> /CD8 <sup>+</sup> T cells |
| Antigen experienced T cells                       | CD45 <sup>+</sup> CD3 <sup>+</sup> CD28 <sup>-</sup>                                      | CD4 <sup>+</sup> /CD8 <sup>+</sup> T cells |
| PD-1 <sup>+</sup> cells                           | CD45 <sup>+</sup> CD3 <sup>+</sup> PD-1 <sup>+</sup>                                      | CD45 <sup>+</sup> CD3 <sup>+</sup>         |
| NKT cells                                         | CD45 <sup>+</sup> CD3 <sup>+</sup> CD56 <sup>+</sup>                                      | Lymphocytes                                |
| B cells                                           | CD45 <sup>+</sup> CD3 <sup>-</sup> CD19 <sup>+</sup>                                      | Lymphocytes                                |
| NK cells                                          | CD45 <sup>+</sup> CD3 <sup>-</sup> CD56 <sup>+</sup>                                      | Lymphocytes                                |
| CD56 <sup>bright</sup> CD16 <sup>-</sup> NK cells | CD45 <sup>+</sup> CD3 <sup>-</sup> CD56 <sup>++</sup> CD16 <sup>-</sup>                   | NK cells                                   |
| CD56 <sup>low</sup> CD16 <sup>-</sup> NK cells    | CD45 <sup>+</sup> CD3 <sup>-</sup> CD56 <sup>+</sup> CD16 <sup>-</sup>                    | NK cells                                   |
| CD56 <sup>low</sup> CD16 <sup>+</sup> NK cells    | CD45 <sup>+</sup> CD3 <sup>-</sup> CD56 <sup>+</sup> CD16 <sup>+</sup>                    | NK cells                                   |

### Myeloid Panel

|                                                   |                                                           |                         |
|---------------------------------------------------|-----------------------------------------------------------|-------------------------|
| Neutrophils                                       | CD45 <sup>+</sup> CD16 <sup>+</sup>                       | CD45 <sup>+</sup> alive |
| Neutrophils CD16 <sup>+</sup> CD15 <sup>low</sup> | CD45 <sup>+</sup> CD16 <sup>+</sup> CD15 <sup>low</sup>   | Neutrophils             |
| Neutrophils CD16 <sup>+</sup> CD15 <sup>+</sup>   | CD45 <sup>+</sup> CD16 <sup>+</sup> CD15 <sup>+</sup>     | Neutrophils             |
| Eosinophils                                       | CD45 <sup>+</sup> CD16 <sup>+</sup> Siglec-8 <sup>+</sup> | CD45 <sup>+</sup> alive |
| Atypical monocytes                                | SSC/FSC                                                   | CD45 <sup>+</sup> alive |
| Monocytes                                         | SSC/CD14 <sup>+</sup>                                     | CD45 <sup>+</sup> alive |
| CD14 <sup>+</sup> CD16 <sup>-</sup> monocytes     | CD45 <sup>+</sup> CD14 <sup>+</sup> CD16 <sup>-</sup>     | Monocytes               |
| CD14 <sup>+</sup> CD16 <sup>+</sup> monocytes     | CD45 <sup>+</sup> CD14 <sup>+</sup> CD16 <sup>+</sup>     | Monocytes               |
| CD14 <sup>low</sup> CD16 <sup>+</sup> monocytes   | CD45 <sup>+</sup> CD14 <sup>low</sup> CD16 <sup>+</sup>   | Monocytes               |

**Table S2.** Flow cytometry panels used to evaluate the study groups

| Antibody cocktail                                                      | Fluorophore | Company and Reference number | Volume per test (uL) |
|------------------------------------------------------------------------|-------------|------------------------------|----------------------|
| <b>#1: Neutrophils, Eosinophils, monocytes, B, NK, NKT lymphocytes</b> |             |                              |                      |
| CD45                                                                   | APC-H7      | BD. 560178                   | 1.25                 |
| CD16                                                                   | APC         | Palex. 302012                | 0.63                 |
| CD15                                                                   | BV510       | BD. 563141                   | 1.25                 |
| Siglec-8                                                               | BV711       | BD. 747870                   | 1.25                 |
| CD3                                                                    | APC-R700    | BD. 565119                   | 0.63                 |
| CD19                                                                   | BV421       | BD. 562440                   | 0.63                 |
| CD56                                                                   | BV785       | Palex. 362549                | 0.31                 |
| CD14                                                                   | FITC        | BD. 555397                   | 10                   |
| CD163                                                                  | PE-Cy7      | Biolegend. 333614            | 2.5                  |
| <b>#2: T lymphocytes subpopulations</b>                                |             |                              |                      |
| CD45                                                                   | APC-H7      | BD. 560178                   | 1.25                 |
| CD3                                                                    | APC-R700    | BD. 565119                   | 0.63                 |
| CD4                                                                    | BV711       | BD. 563028                   | 2.5                  |
| CD8                                                                    | BV650       | BD. 563821                   | 1.25                 |
| CD45RA                                                                 | FITC        | BD. 555488                   | 1.25                 |
| CD197 (CCR7)                                                           | PE-CF5594   | BD. 562381                   | 2.5                  |
| CD196                                                                  | PE-Cy7      | BD. 560620                   | 2.5                  |
| CD183 (CXCR3)                                                          | APC         | BD. 550967                   | 5                    |
| CD28                                                                   | BV510       | BD. 563075                   | 1.25                 |
| CD25                                                                   | PE          | BD. 555432                   | 10                   |
| CD127                                                                  | BV786       | BD. 563324                   | 0.63                 |
| HLA-DR                                                                 | BV421       | BD. 562804                   | 1.25                 |
| PD-1                                                                   | PerCpCy5.5  | Biolegend 329914             | 2.5                  |

**Table S3.** Differential distribution of the immune populations assessed between age-smoking matched controls and IPF. A Saphiro test was performed for each variable and the appropriate statistic test was selected accordingly to their distribution using "compareGroups" R package. Data is shown as mean  $\pm$  SD or median [IQR] accordingly.

| Baseline immune populations                   | Control (n=32)   | IPF (n=32)       | p-value      |
|-----------------------------------------------|------------------|------------------|--------------|
| <b>Innate immune cells</b>                    |                  |                  |              |
| Eosinophils                                   | 0.77 [0.43;1.42] | 1.56 [0.42;2.39] | 0.260        |
| Neutrophils                                   | 61.4 [54.0;63.9] | 65.8 [63.2;69.0] | <b>0.001</b> |
| Monocytes                                     | 7.14 [6.19;7.81] | 6.92 [5.99;7.44] | 0.612        |
| CD14 <sup>+</sup> CD16 <sup>-</sup> monocytes | 87.7 [83.3;88.9] | 88.1 [85.4;90.3] | 0.349        |
| CD14 <sup>+</sup> CD16 <sup>+</sup> monocytes | 6.65 [5.80;9.31] | 6.96 [5.28;9.74] | 0.773        |

|                                                   |                  |                  |                  |
|---------------------------------------------------|------------------|------------------|------------------|
| CD14 <sup>low</sup> CD16 <sup>+</sup> monocytes   | 3.09 [2.23;3.81] | 2.74 [1.81;3.71] | 0.272            |
| NK cells                                          | 11.3 [7.21;15.6] | 11.0 [6.95;16.4] | 0.978            |
| CD56 <sup>bright</sup> CD16 <sup>-</sup> NK cells | 3.96 [2.55;6.84] | 2.75 [1.88;4.89] | 0.143            |
| CD56 <sup>dim</sup> CD16 <sup>+</sup> NK cells    | 90.0 [84.6;91.8] | 90.3 [84.1;94.5] | 0.486            |
| CD56 <sup>dim</sup> CD16 <sup>-</sup> NK cells    | 4.79 [3.92;8.02] | 4.61 [2.05;8.23] | 0.220            |
| NKT cells                                         | 2.34 [1.40;5.54] | 2.31 [1.46;4.08] | 0.490            |
| <b>Adaptive immune cells</b>                      |                  |                  |                  |
| Lymphocytes                                       | 29.6 [27.4;37.0] | 25.1 [22.0;27.2] | <b>&lt;0.001</b> |
| B cells                                           | 9.51 [7.51;11.0] | 6.84 [4.98;10.7] | <b>0.025</b>     |
| CD8 <sup>+</sup> T cells                          | 31.4 (9.64)      | 32.8 (12.8)      | 0.644            |
| CD8 <sup>+</sup> HLA-DR <sup>+</sup> T cells      | 16.1 [12.4;22.2] | 22.5 [16.6;33.7] | <b>0.023</b>     |
| CD8 <sup>+</sup> CD28 <sup>-</sup> T cells        | 42.0 [23.9;65.0] | 54.8 [49.2;69.6] | <b>0.040</b>     |
| Effector CD8 <sup>+</sup> T cells                 | 27.8 [17.3;38.8] | 35.9 [15.9;46.2] | 0.324            |
| Central memory CD8 <sup>+</sup> T cells           | 15.4 [7.86;21.8] | 8.87 [5.53;12.9] | <b>0.016</b>     |
| Effector memory CD8 <sup>+</sup> T cells          | 39.8 (14.2)      | 46.9 (14.9)      | 0.055            |
| Naive CD8 <sup>+</sup> T cells                    | 9.34 [6.38;18.1] | 6.48 [3.34;11.0] | <b>0.010</b>     |
| CD4 <sup>+</sup> T cells                          | 61.9 (11.1)      | 61.0 (14.2)      | 0.779            |
| CD4 <sup>+</sup> HLA-DR <sup>+</sup> T cells      | 8.77 [6.31;10.2] | 9.08 [6.23;14.4] | 0.229            |
| CD4 <sup>+</sup> CD28 <sup>-</sup> T cells        | 3.58 [0.67;9.69] | 3.46 [1.47;10.0] | 0.814            |
| Effector CD4 <sup>+</sup> T cells                 | 0.32 [0.14;1.35] | 0.53 [0.13;1.84] | 0.643            |
| Central memory CD4 <sup>+</sup> T cells           | 57.9 [50.5;63.6] | 53.7 [42.7;65.8] | 0.330            |
| Effector memory CD4 <sup>+</sup> T cells          | 23.6 [16.2;30.7] | 21.5 [15.2;34.0] | 0.989            |
| Naive CD4 <sup>+</sup> T cells                    | 17.9 [12.3;20.7] | 15.1 [11.4;27.3] | 0.973            |
| Th1 cells                                         | 15.5 (7.87)      | 23.1 (10.4)      | <b>0.002</b>     |
| Th17 cells                                        | 15.4 [10.8;20.9] | 7.83 [6.32;12.8] | <b>&lt;0.001</b> |
| Th1Th17 cells                                     | 6.42 [4.17;8.46] | 3.96 [2.69;6.88] | <b>0.021</b>     |
| Regulatory T cells (Tregs)                        | 6.04 [5.25;7.87] | 7.20 [5.85;9.03] | 0.072            |
| PD-1 <sup>+</sup> cells                           | 1.96 [1.63;3.62] | 2.82 [1.30;6.32] | 0.679            |
| <b>Ratios</b>                                     |                  |                  |                  |
| NLR(Neutrophil-to-lymphocyte Ratio)               | 2.09 [1.45;2.27] | 2.61 [2.40;3.05] | <0.001           |
| MLR(Monocyte-to-lymphocyte Ratio)                 | 0.23 [0.18;0.27] | 0.26 [0.23;0.35] | 0.012            |
| CD4/CD8 Ratio                                     | 1.95 [1.42;2.80] | 1.97 [1.27;2.92] | 0.809            |
| Th1/Th17 Ratio                                    | 0.97 [0.63;1.72] | 3.14 [1.78;3.94] | <0.001           |
| Th17/Tregs Ratio                                  | 2.46 [1.76;3.62] | 1.09 [0.87;1.66] | <b>&lt;0.001</b> |

**Table S4.** Spearman correlations between baseline blood immune populations and inflammation ratios, and lung function at recruitment in IPF patients.

| Baseline immune populations                       | Baseline FVC% |              | Baseline DLCO% |              |
|---------------------------------------------------|---------------|--------------|----------------|--------------|
|                                                   | Rho           | p-value      | Rho            | p-value      |
| <b>Innate immune cells</b>                        |               |              |                |              |
| Eosinophils                                       | 0,349         | 0,186        | 0,662          | <b>0,010</b> |
| Neutrophils                                       | -0,124        | 0,498        | -0,496         | <b>0,005</b> |
| Monocytes                                         | 0,074         | 0,688        | 0,112          | 0,557        |
| CD14 <sup>+</sup> CD16 <sup>-</sup> monocytes     | -0,041        | 0,822        | -0,144         | 0,447        |
| CD14 <sup>+</sup> CD16 <sup>+</sup> monocytes     | 0,136         | 0,458        | 0,028          | 0,884        |
| CD14 <sup>low</sup> CD16 <sup>+</sup> monocytes   | 0,088         | 0,634        | 0,294          | 0,114        |
| NK cells                                          | 0,037         | 0,840        | -0,271         | 0,147        |
| CD56 <sup>bright</sup> CD16 <sup>-</sup> NK cells | -0,102        | 0,578        | 0,138          | 0,467        |
| CD56 <sup>dim</sup> CD16 <sup>+</sup> NK cells    | -0,063        | 0,731        | -0,152         | 0,422        |
| CD56 <sup>dim</sup> CD16 <sup>-</sup> NK cells    | 0,141         | 0,443        | 0,175          | 0,354        |
| NKT cells                                         | -0,141        | 0,440        | -0,123         | 0,517        |
| <b>Adaptive immune cells</b>                      |               |              |                |              |
| Lymphocytes                                       | 0,220         | 0,226        | 0,470          | <b>0,009</b> |
| B cells                                           | 0,001         | 0,997        | -0,091         | 0,631        |
| CD8 <sup>+</sup> T cells                          | -0,227        | 0,212        | -0,213         | 0,259        |
| CD8 <sup>+</sup> HLA-DR <sup>+</sup> T cells      | -0,142        | 0,437        | -0,005         | 0,981        |
| CD8 <sup>+</sup> CD28 <sup>-</sup> T cells        | -0,273        | 0,130        | -0,193         | 0,306        |
| Effector CD8 <sup>+</sup> T cells                 | 0,009         | 0,959        | 0,085          | 0,654        |
| Central memory CD8 <sup>+</sup> T cells           | -0,132        | 0,473        | -0,044         | 0,817        |
| Effector memory CD8 <sup>+</sup> T cells          | -0,063        | 0,733        | -0,186         | 0,326        |
| Naive CD8 <sup>+</sup> T cells                    | 0,268         | 0,138        | 0,203          | 0,282        |
| CD4 <sup>+</sup> T cells                          | 0,235         | 0,195        | 0,252          | 0,180        |
| CD4 <sup>+</sup> HLA-DR <sup>+</sup> T cells      | 0,033         | 0,860        | -0,064         | 0,738        |
| CD4 <sup>+</sup> CD28 <sup>-</sup> T cells        | -0,043        | 0,814        | -0,149         | 0,431        |
| Effector CD4 <sup>+</sup> T cells                 | -0,063        | 0,733        | 0,049          | 0,798        |
| Central memory CD4 <sup>+</sup> T cells           | -0,410        | 0,020        | -0,272         | 0,146        |
| Effector memory CD4 <sup>+</sup> T cells          | -0,184        | 0,312        | -0,067         | 0,727        |
| Naive CD4 <sup>+</sup> T cells                    | 0,533         | <b>0,002</b> | 0,192          | 0,309        |
| Th1 cells                                         | -0,116        | 0,528        | -0,058         | 0,761        |
| Th17 cells                                        | -0,290        | 0,107        | -0,215         | 0,255        |
| Th1Th17 cells                                     | -0,142        | 0,439        | -0,056         | 0,770        |
| Regulatory T cells (Tregs)                        | 0,101         | 0,584        | -0,176         | 0,353        |
| PD-1 <sup>+</sup> cells                           | -0,121        | 0,510        | -0,015         | 0,936        |
| <b>Ratios</b>                                     |               |              |                |              |
| NLR(Neutrophil-to-lymphocyte Ratio)               | -0,129        | 0,482        | -0,467         | <b>0,009</b> |
| MLR(Monocyte-to-lymphocyte Ratio)                 | -0,216        | 0,234        | -0,434         | <b>0,016</b> |
| CD4/CD8 Ratio                                     | 0,232         | 0,201        | 0,237          | 0,207        |
| Th1/Th17 Ratio                                    | 0,205         | 0,260        | 0,137          | 0,472        |
| Th17/Tregs Ratio                                  | -0,293        | 0,103        | -0,040         | 0,832        |

**Table S5.** Differential distribution of the baseline immune populations assessed between the two subgroups of IPF. Data is shown as mean  $\pm$  SD or median [IQR]. A Saphiro test was performed for each variable and the appropriate statistic test was selected accordingly to their distribution.

| Baseline immune populations                       | Progressor (n=18) | Stable (n=13)    | p-value          |
|---------------------------------------------------|-------------------|------------------|------------------|
| <b>Innate immune cells</b>                        |                   |                  |                  |
| Eosinophils                                       | 0.98 [0.40;1.92]  | 1.96 [1.54;3.31] | 0.278            |
| Neutrophils                                       | 65.6 [63.4;66.2]  | 66.5 [55.8;69.9] | 0.471            |
| Monocytes                                         | 7.01 [6.04;7.94]  | 6.47 [5.61;7.12] | 0.317            |
| CD14 <sup>+</sup> CD16 <sup>-</sup> monocytes     | 87.5 [85.2;90.3]  | 88.2 [86.8;90.3] | 0.734            |
| CD14 <sup>+</sup> CD16 <sup>+</sup> monocytes     | 6.52 [5.11;11.4]  | 7.50 [5.68;9.20] | 0.857            |
| CD14 <sup>low</sup> CD16 <sup>+</sup> monocytes   | 2.74 [2.25;3.89]  | 2.86 [1.77;3.20] | 1.000            |
| NK cells                                          | 11.0 [6.07;16.0]  | 8.39 [7.16;16.3] | 0.826            |
| CD56 <sup>bright</sup> CD16 <sup>-</sup> NK cells | 3.43 [1.92;5.60]  | 2.16 [1.99;3.87] | 0.447            |
| CD56 <sup>dim</sup> CD16 <sup>+</sup> NK cells    | 86.9 [82.4;94.4]  | 92.6 [87.9;94.5] | 0.562            |
| CD56 <sup>dim</sup> CD16 <sup>-</sup> NK cells    | 6.30 [2.10;10.4]  | 3.04 [1.95;4.94] | 0.347            |
| NKT cells                                         | 2.79 [2.06;5.07]  | 1.54 [0.92;2.79] | <b>0.031</b>     |
| <b>Adaptive immune cells</b>                      |                   |                  |                  |
| Lymphocytes                                       | 25.4 [24.0;27.2]  | 24.9 [18.9;27.1] | 0.734            |
| B cells                                           | 6.49 [4.74;8.99]  | 9.13 [5.55;14.2] | 0.186            |
| CD8 <sup>+</sup> T cells                          | 39.4 (10.6)       | 22.4 (8.20)      | <b>&lt;0.001</b> |
| CD8 <sup>+</sup> HLA-DR <sup>+</sup> T cells      | 29.2 (15.3)       | 21.4 (13.5)      | 0.145            |
| CD8 <sup>+</sup> CD28 <sup>-</sup> T cells        | 64.4 (12.0)       | 39.6 (18.0)      | <b>&lt;0.001</b> |
| Effector CD8 <sup>+</sup> T cells                 | 40.6 [25.9;58.0]  | 22.5 [14.3;42.1] | 0.109            |
| Central memory CD8 <sup>+</sup> T cells           | 7.28 [4.68;10.7]  | 11.8 [8.42;16.5] | <b>0.020</b>     |
| Effector memory CD8 <sup>+</sup> T cells          | 44.9 [31.0;60.1]  | 42.1 [37.2;59.2] | 0.435            |
| Naive CD8 <sup>+</sup> T cells                    | 4.22 [2.30;7.79]  | 9.84 [6.33;12.6] | <b>0.024</b>     |
| CD4 <sup>+</sup> T cells                          | 53.6 (11.2)       | 72.5 (9.80)      | <b>&lt;0.001</b> |
| CD4 <sup>+</sup> HLA-DR <sup>+</sup> T cells      | 11.6 [8.63;16.4]  | 7.58 [6.08;13.5] | 0.128            |
| CD4 <sup>+</sup> CD28 <sup>-</sup> T cells        | 4.31 [1.98;15.8]  | 1.62 [0.54;5.59] | <b>0.050</b>     |
| Effector CD4 <sup>+</sup> T cells                 | 0.69 [0.18;2.17]  | 0.51 [0.11;1.61] | 0.548            |
| Central memory CD4 <sup>+</sup> T cells           | 52.3 (14.7)       | 54.5 (13.8)      | 0.675            |
| Effector memory CD4 <sup>+</sup> T cells          | 30.0 (11.1)       | 16.3 (8.40)      | <b>0.001</b>     |
| Naive CD4 <sup>+</sup> T cells                    | 13.5 [10.3;15.3]  | 26.2 [14.7;39.6] | <b>0.013</b>     |
| Th1 cells                                         | 26.1 (10.4)       | 19.0 (9.58)      | 0.061            |
| Th17 cells                                        | 7.63 [5.03;12.1]  | 7.93 [6.90;14.7] | 0.298            |
| Th1Th17 cells                                     | 4.87 [2.13;7.29]  | 3.71 [3.07;5.00] | 0.749            |
| Regulatory T cells (Tregs)                        | 7.50 (2.71)       | 7.40 (1.76)      | 0.902            |
| PD-1 <sup>+</sup> cells                           | 2.40 [1.31;3.94]  | 1.27 [0.94;2.15] | 0.230            |
| <b>Ratios</b>                                     |                   |                  |                  |
| NLR(Neutrophil-to-lymphocyte Ratio)               | 2.51 [2.43;2.75]  | 2.67 [2.06;3.47] | 0.575            |
| MLR(Monocyte-to-lymphocyte Ratio)                 | 0.27 [0.24;0.33]  | 0.24 [0.20;0.39] | 0.496            |
| CD4/CD8 Ratio                                     | 1.46 [0.99;2.03]  | 2.94 [2.76;4.22] | <b>&lt;0.001</b> |
| Th1/Th17 Ratio                                    | 3.49 (1.99)       | 2.41 (1.70)      | 0.115            |
| Th17/Tregs Ratio                                  | 1.04 [0.84;1.76]  | 1.11 [0.97;1.58] | 0.401            |

**Table S6:** Differential distribution of the significant immune cell populations across groups (Controls, Stable and Progressors). Differences in the distribution were assessed using Kruskal-Wallis and post-hoc Mann-Whitney.

|                                              | Mean±SD     |             |             | Kruskal-Wallis | Mann-whitney Post-hoc |                       |                      |
|----------------------------------------------|-------------|-------------|-------------|----------------|-----------------------|-----------------------|----------------------|
|                                              | Control     | Stable      | Progressor  | p-value        | Control vs Stable     | Control vs Progressor | Progressor vs Stable |
| <b>Innate immune cells</b>                   |             |             |             |                |                       |                       |                      |
| Neutrophils                                  | 58,41±7,88  | 65,05±15,1  | 63,78±11,47 | 0,006          | <b>0,048</b>          | <b>0,010</b>          | 0,483                |
| <b>Adaptive immune cells</b>                 |             |             |             |                |                       |                       |                      |
| Lymphocytes                                  | 30,14±7,31  | 24,54±12,83 | 24,51±7,64  | 0,010          | <b>0,032</b>          | <b>0,030</b>          | 0,904                |
| B cells                                      | 9,96±2,78   | 11,4±8,74   | 7,98±5,5    | 0,036          | 0,615                 | <b>0,024</b>          | 0,294                |
| CD8 <sup>+</sup> T cells                     | 31,44±9,64  | 22,44±8,2   | 39,42±10,6  | 0,000          | <b>0,007</b>          | <b>0,018</b>          | <b>0,000</b>         |
| CD8 <sup>+</sup> HLA-DR <sup>+</sup> T cells | 17,75±7,41  | 21,44±13,45 | 29,21±15,25 | 0,018          | 0,540                 | <b>0,014</b>          | 0,164                |
| CD8 <sup>+</sup> CD28 <sup>-</sup> T cells   | 43,39±22,01 | 39,59±17,98 | 64,4±11,98  | 0,001          | 0,647                 | <b>0,002</b>          | <b>0,002</b>         |
| Central memory CD8 <sup>+</sup> T cells      | 15,5±8,59   | 13,42±6,81  | 8,81±5,99   | 0,010          | 0,540                 | <b>0,012</b>          | <b>0,032</b>         |
| Naive CD8 <sup>+</sup> T cells               | 14,47±13,32 | 10,9±7,44   | 5,74±4,6    | 0,003          | 0,647                 | <b>0,002</b>          | <b>0,037</b>         |
| CD4 <sup>+</sup> T cells                     | 61,91±11,09 | 72,52±9,79  | 53,58±11,2  | 0,000          | <b>0,004</b>          | <b>0,028</b>          | <b>0,000</b>         |
| Effector memory CD4 <sup>+</sup> T cells     | 24,63±11,97 | 16,32±8,4   | 29,97±11,06 | 0,002          | <b>0,019</b>          | 0,070                 | <b>0,005</b>         |
| Naive CD4 <sup>+</sup> T cells               | 18,94±11,95 | 27,33±15,86 | 14,17±7,53  | 0,023          | 0,088                 | 0,088                 | <b>0,041</b>         |
| Th1 cells                                    | 15,49±7,87  | 19±9,58     | 26,08±10,44 | 0,001          | 0,220                 | <b>0,001</b>          | 0,085                |
| Th17 cells                                   | 17,29±9,24  | 12,32±9,13  | 9,29±5,24   | 0,001          | <b>0,024</b>          | <b>0,001</b>          | 0,312                |
| NKT cells                                    | 4,23±3,91   | 2,03±1,38   | 4,75±5,38   | 0,072          | 0,087                 | 0,562                 | 0,087                |
| <b>Ratios</b>                                |             |             |             |                |                       |                       |                      |
| NLR(Neutrophil-to-lymphocyte Ratio)          | 1,92±0,61   | 4,61±5,19   | 3,01±1,74   | 0,002          | <b>0,031</b>          | <b>0,001</b>          | 0,594                |
| MLR(Monocyte-to-lymphocyte Ratio)            | 0,22±0,06   | 0,37±0,32   | 0,35±0,22   | 0,045          | 0,251                 | <b>0,047</b>          | 0,514                |
| CD4/CD8 Ratio                                | 2,35±1,52   | 4,07±2,99   | 1,53±0,72   | 0,000          | <b>0,008</b>          | <b>0,020</b>          | <b>0,000</b>         |

|                  |           |          |           |          |                     |                        |       |
|------------------|-----------|----------|-----------|----------|---------------------|------------------------|-------|
| Th1/Th17 Ratio   | 1,23±0,94 | 2,41±1,7 | 3,49±1,99 | 9,88E+09 | <i><b>0,038</b></i> | <i><b>2,69E+09</b></i> | 0,183 |
| Th17/Tregs Ratio | 2,83±1,64 | 2±2,43   | 1,29±0,67 | 0,000    | <i><b>0,006</b></i> | <i><b>0,000</b></i>    | 0,417 |

Supplementary Figures

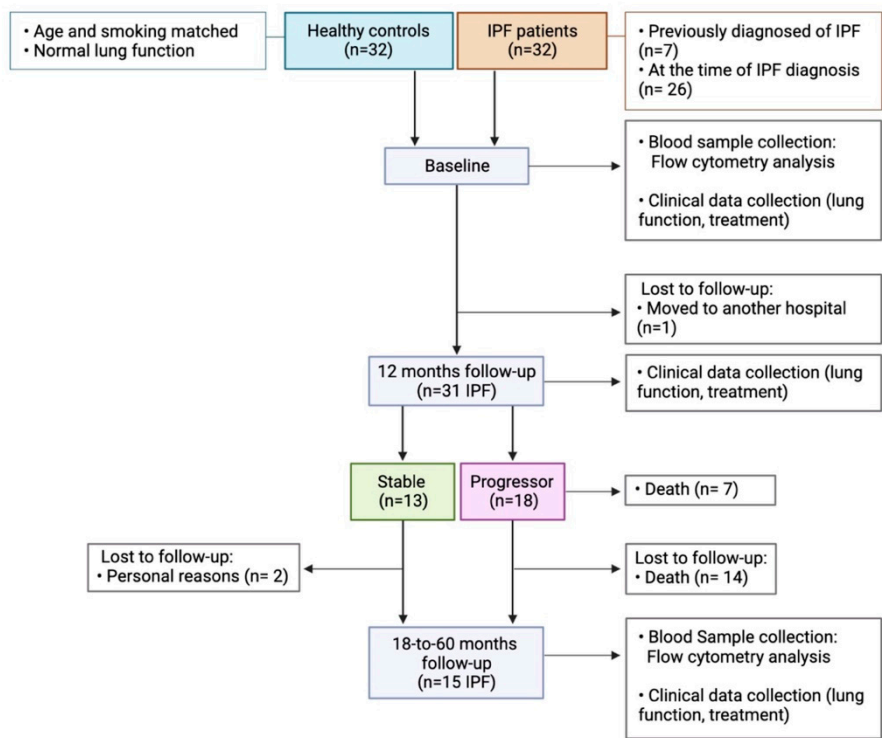

**Figure S1.** CONSORT flow diagram showing participant flow through each stage of the study (Created with BioRender.com).

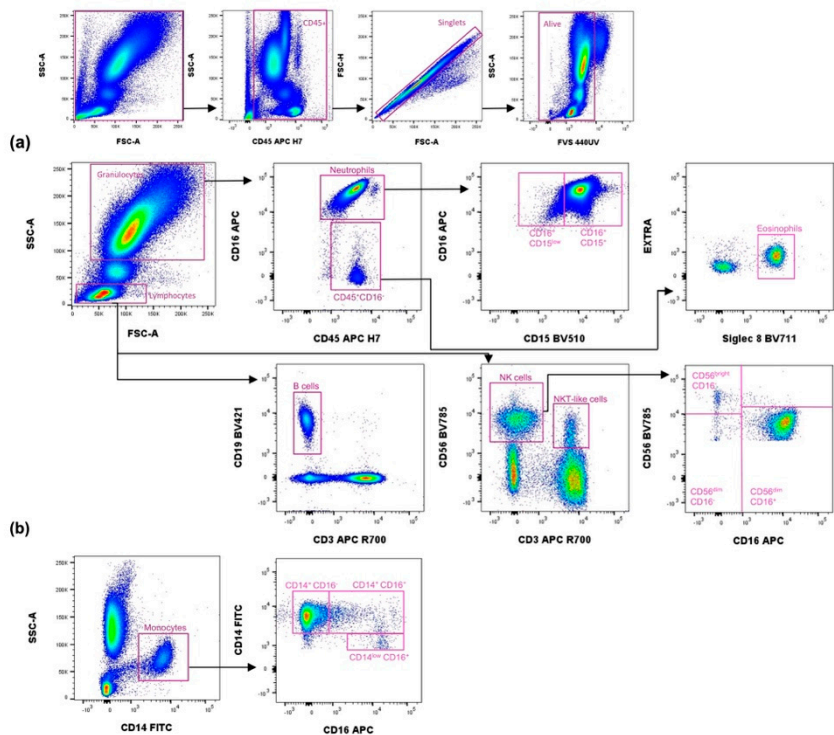



**Figure S2.** Representative gating strategy 1 for the evaluation of immune parameters in peripheral blood from IPF patients or healthy individuals. Flow cytometry staining was performed as described in *Methods*. The gating strategy outlined in A) shows immune panel used to identify the following populations from a sample after excluding debris and gating on CD45<sup>+</sup> single live cells: neutrophils, eosinophils, B cells, NK and NKT cell populations. Gating strategy B) shows monocytes and their subcategorization into classical (CD14<sup>+</sup>CD16<sup>-</sup>), intermediate (CD14<sup>+</sup>CD16<sup>+</sup>) and non-classical (CD14<sup>low</sup>CD16<sup>+</sup>).

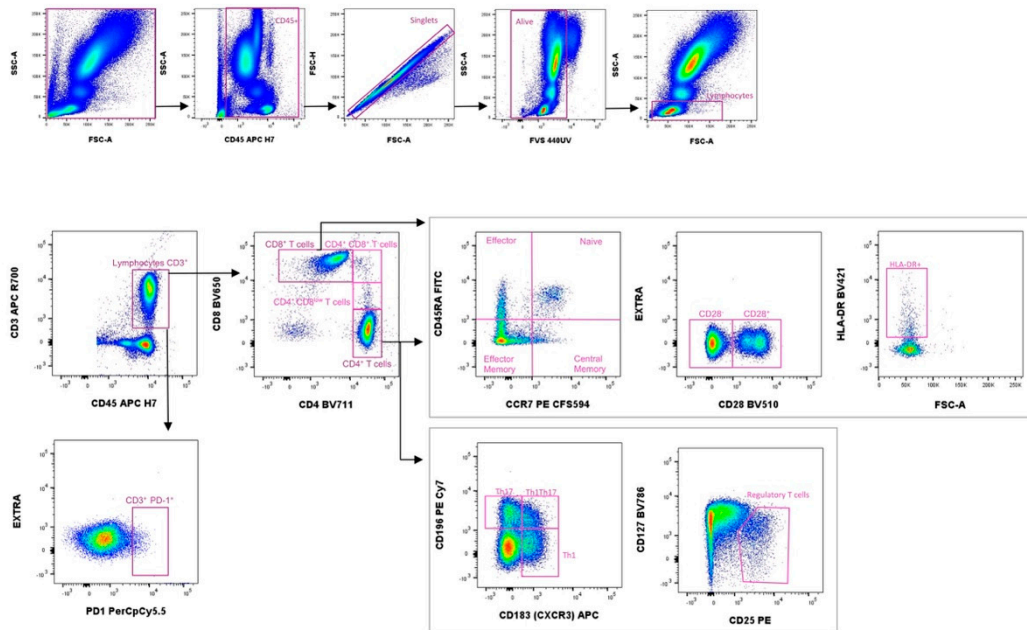

**Figure S3.** Representative gating strategy 2 for the evaluation of immune parameters in peripheral blood from IPF patients or healthy individuals. Flow cytometric staining was performed as described in *Methods*. The gating strategy shows immune panel used to identify the following T cell populations from a sample after excluding debris and gating on CD45<sup>+</sup> single live cells: CD8<sup>+</sup>, CD4<sup>+</sup>, Th1, Th17, Treg cells, Effector, Naive, Effector memory and Central memory T cells. Populations of CD8<sup>+</sup> and CD4<sup>+</sup> were also evaluated for the expression of CD28, PD-1 and HLA-DR activation and/or exhaustion markers.
